# Supplementary material
Source: PubMed Central journal article supplement (PMC6461796)
Supplement: 41431_2019_346_MOESM1_ESM.pdf [file 41431_2019_346_MOESM1_ESM.pdf]

## Supplementary Information

### Case-control analysis identifies shared properties of rare germline variation in cancer predisposing genes

Mykyta Artomov<sup>1,2</sup>, Vijai Joseph<sup>3</sup>, Grace Tiao<sup>1,2</sup>, Tinu Thomas<sup>3</sup>, Kasmintan Schrader<sup>3</sup>, Robert J. Klein<sup>3</sup>, Adam Kiezun<sup>2</sup>, Namrata Gupta<sup>2</sup>, Lauren Margolin<sup>2</sup>, Alexander J. Stratigos<sup>4</sup>, Ivana Kim<sup>5</sup>, Kristen Shannon<sup>6</sup>, Leif W. Ellisen<sup>6,7</sup>, Daniel Haber<sup>6,7,8</sup>, Gad Getz<sup>2</sup>, Hensin Tsao<sup>9,10</sup>, Steven M. Lipkin<sup>11</sup>, David Altshuler<sup>2</sup>, Kenneth Offit<sup>\*3,12</sup> and Mark J. Daly<sup>\*1,2,13</sup>

|                                         |           |
|-----------------------------------------|-----------|
| <b>PATIENT COHORTS .....</b>            | <b>3</b>  |
| <b>GENETIC SCREENING .....</b>          | <b>4</b>  |
| <b>SEQUENCING DATA PROCESSING .....</b> | <b>5</b>  |
| <b>SUPPLEMENTARY FIGURE 1.....</b>      | <b>6</b>  |
| <b>SUPPLEMENTARY FIGURE 2.....</b>      | <b>7</b>  |
| <b>SUPPLEMENTARY FIGURE 3.....</b>      | <b>8</b>  |
| <b>SUPPLEMENTARY FIGURE 4.....</b>      | <b>9</b>  |
| <b>SUPPLEMENTARY TABLE 1.....</b>       | <b>10</b> |
| <b>SUPPLEMENTARY TABLE 2.....</b>       | <b>11</b> |
| <b>SUPPLEMENTARY TABLE 3.....</b>       | <b>12</b> |

## Patient cohorts

**Primary discovery set.** All patients provided written consent for this study and were enrolled at 4 sites- the Massachusetts General Hospital (MGH; cutaneous melanoma (CM), breast cancer (BC) and Li-Fraumeni syndrome patients), the A. Sygros Hospital in Athens, Greece (CM patients) and the Massachusetts Eye and Ear Infirmary (MEEI; ocular melanoma (OM) patients) in Boston, MA, the Memorial Sloan Kettering Cancer Center in New York, NY (MSKCC; BC and colon cancer (CC) patients) - in accordance with protocols approved at these institutions.

All probands were considered “genetically enriched” based on the following criteria.

### 1. MGH:

- a. **CM:** a histologically-proven CM AND at least one 1<sup>st</sup> degree affected relative OR  $\geq 2$  affected relatives on one side of the family regardless of degree of relationship (proband CM + relative with CM, “Familial CM/CM”; proband CM + relative with OM, “Familial CM/OM”) OR  $\geq 3$  primary melanomas regardless of family history (“MPM CM-CM”).
- b. **BC:** a histologically-proven BC AND at least one 1<sup>st</sup> degree affected relative (Familial BC) OR age at clinical diagnosis less than 40 years old (Mean=34.29, SD=3.49).
- c. **Li-Fraumeni syndrome:** Patients under age of 45 with multiple primary cancers without family history OR patients under age 45 with familial history of multiple cancers ( $\geq 2$ ). Patients were screened for *TP53* variation and found negative for disease-relevant DNA alterations. Cancer syndromes observed in the cohort included breast cancer (36.4%), adenoid cystic carcinoma (2.72%), basal cell carcinoma (3.66%), central nervous system lymphoma (3.64%), colon cancer (4.55%), ductal carcinoma in situ (0.91%), Ewing sarcoma (0.91%), lung cancer (1.82%), Lynch syndrome (6.36%), melanoma (3.64%), neuroblastoma (2.73%), non-Hodgkin lymphoma (1.82%), osteosarcoma (5.45%), ovarian cancer (1.82%), prostate cancer (1.82%), sarcoma (1.82%), squamous cell carcinoma (2.73%),

thyroid cancer (3.64%), thymoma (1.82%) and other cancer types (11.74%). Mean age of the first cancer onset – 29.7 (SD=11.3).

2. **The A. Sygros Hospital:** a histologically-proven CM AND  $\geq 1$  affected relative on one side of the family (“Familial CM/CM”) OR  $\geq 2$  primary melanoma (“MPM CM-CM”).
3. **MEEI:** a histologically or clinically diagnosed OM AND  $\geq 1$  relative affected with either CM or OM (proband OM + relative with OM, “Familial OM/OM”; proband OM + relative with CM, “Familial OM/CM”) OR a second CM (“MPM OM-CM”).
4. **MSKCC:**
  - a. **BC:** a histologically-proven BC AND at least one 1<sup>st</sup> degree affected relative (Familial BC) OR age at clinical diagnosis less than 35 years old (Mean=31.82, SD=3.11).
  - b. **CC:** 54.5% patients were diagnosed with hereditary nonpolyposis colorectal cancer (HNPCC), satisfied Amsterdam criteria and had age at diagnosis less than 45 years. 45.5% patients did not satisfy Amsterdam criteria but had age at clinical diagnosis less than 45 years old. Age distribution: Mean=36.05, SD=6.51.

## Genetic screening

At the time of enrollment patients were analyzed with respect to NCCN guidelines for corresponding cancer type management to determine whether they match criteria for genetic screening.

Individuals who satisfied the criteria were screened and if found positive, removed from downstream analysis. Breast cancer cohort were analyzed for germline variation in *BRCA1*, *BRCA2*, *PALB2*, *ATM*, *CHEK2*, *TP53*, colon cancer cohort was analyzed for germline variation in *MLH1*, *MSH2*, *MSH6*, *APC*, *MYH* and *TP53*. Li-Fraumeni cohort was analyzed for *TP53* germline variation. Cutaneous and ocular melanoma cohorts were screened for *CDKN2A* and *BAP1* variants, respectively, with Sanger sequencing, though several positively identified subjects were kept in the study (5 *CDKN2A* and 4 *BAP1* loss-of-function variants were identified, respectively) as positive

controls. DNA variants identified by exome sequencing in this cohort were confirmed with Sanger sequencing data obtained at the time of screening.

### **Unselected cases cohort**

We used TCGA exome sequencing data from the phenotypes corresponding to those represented in selected cases (TCGA phenotype codes: SKCM, BRCA, COAD, UM). Data used in this manuscript is available from dbGAP under accession number phs000178.v1.p1.

### **Sequencing data processing**

**PCA.** Downstream association studies require careful matching of cases and controls. Principal component analysis was performed on the set of autosomal LD-pruned common variants (Purcell 5K) using Eigenstrat. Clustering of samples was performed using k-means clustering algorithm. Identification of ancestries within clusters was performed using 1000 Genomes samples as a training set.

**Relatedness.** Only European samples were subjected to downstream analysis. Within European PCA cluster we performed relatedness analysis on using PLINK and eliminated samples with  $PI\_HAT > 0.2$ . From the set of related samples the one with the greater average sequencing coverage was kept.

**Case-control matching.** Fisher's exact test was performed on the common synonymous variation to ensure the absence of systematic bias between cases and controls. Under the null hypothesis – common synonymous variation is benign and should be equally present in cases and controls. Null QQ-plot with per SNP p-values would thus prove the accuracy of matching.

# Sup. Fig. 1

## A

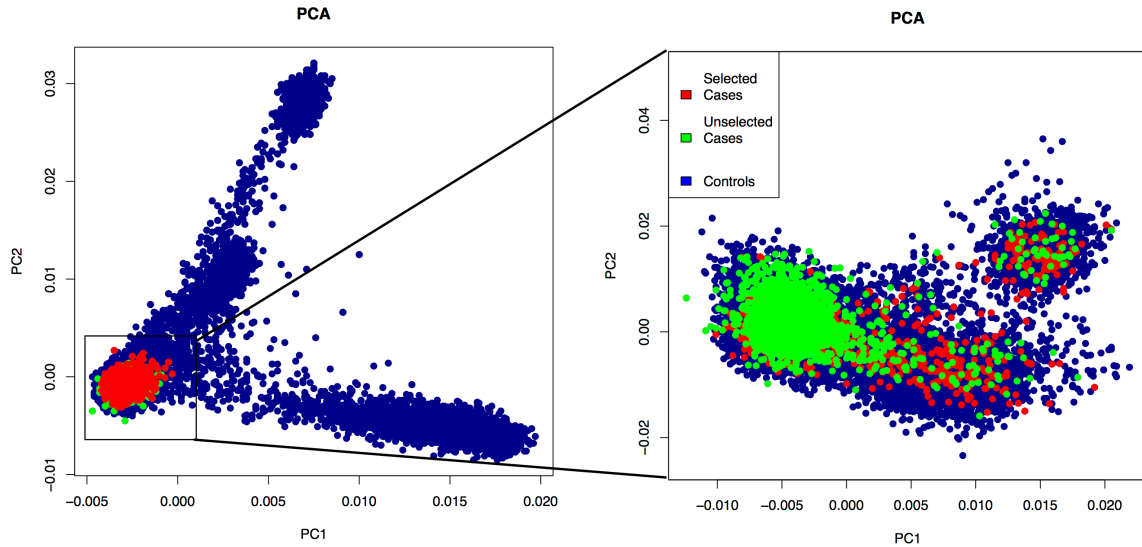

## B

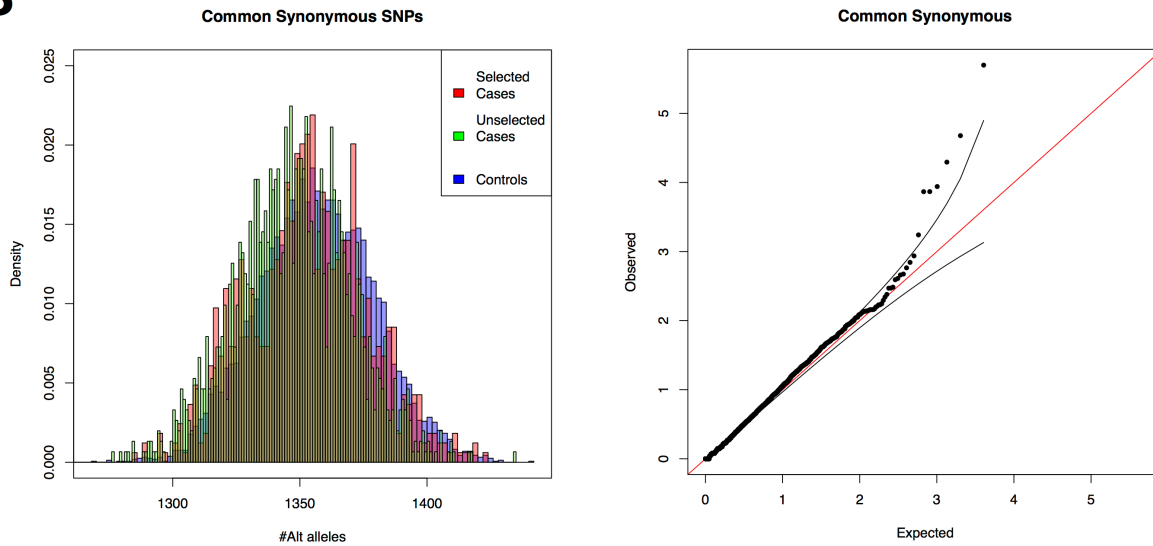

**Supplementary Figure 1.** (A) Principle component analysis on common autosomal variants; (B) Distribution of common synonymous variants burden and QQ-plot of Fisher's exact test, confirming case-control matching.

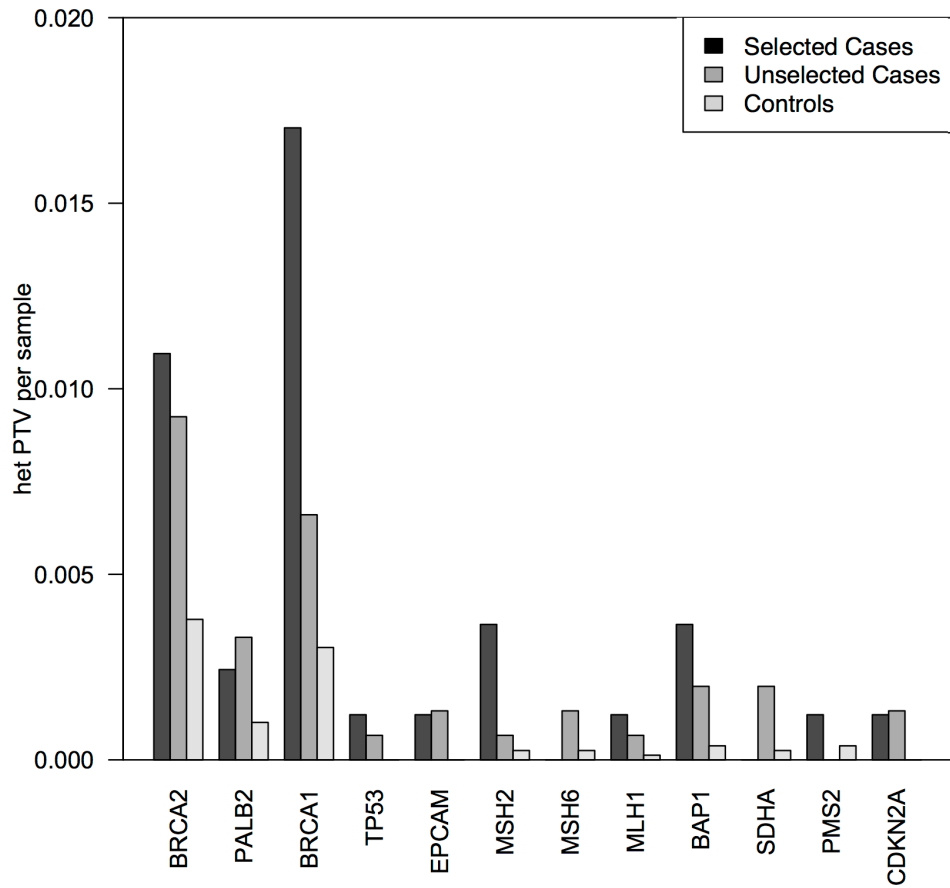

**Supplementary Figure 2.** Top genes contributing protein-truncating variants to the association signal from autosomal dominant disorders linked gene list.

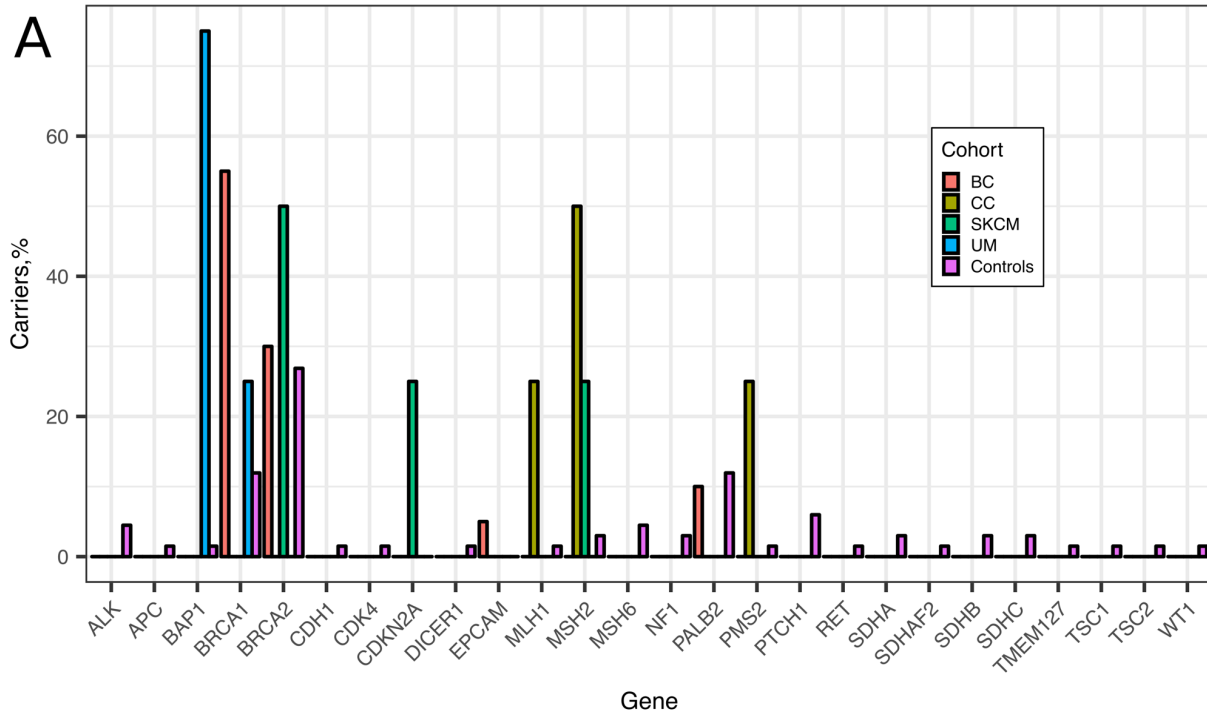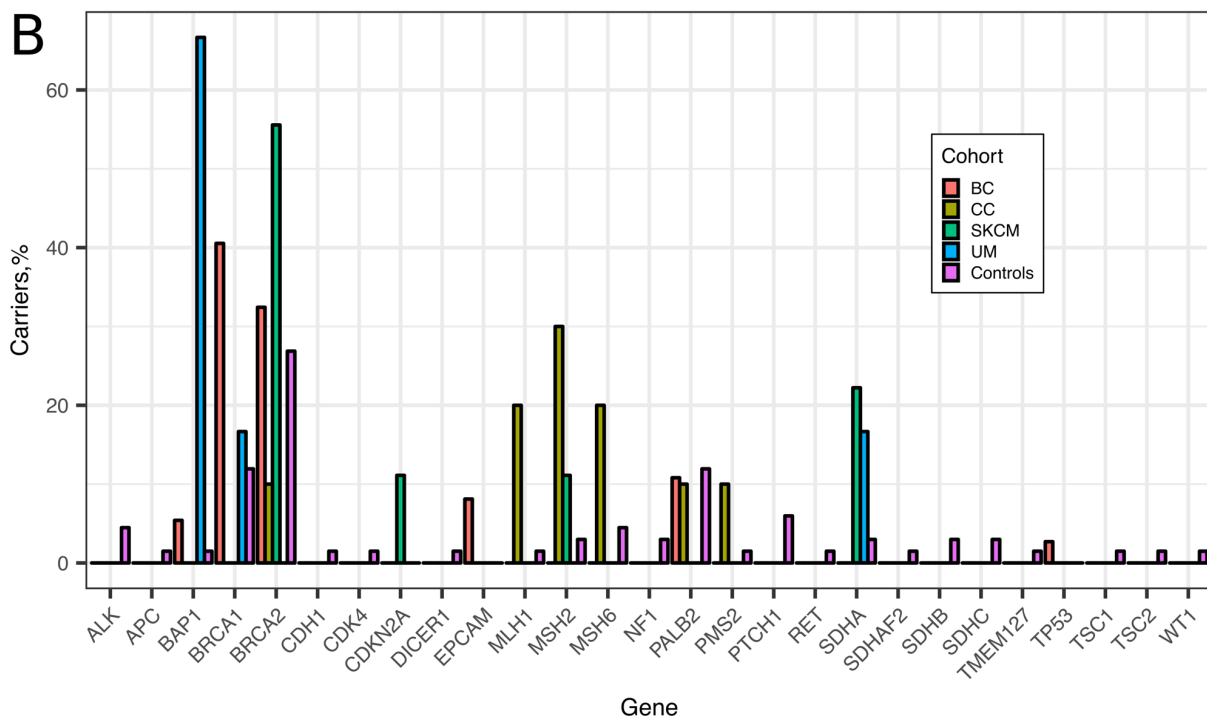

**Supplementary Figure 3.** Carriers distribution across genes with at least 1 PTV. **(A)** Selected cases and controls; **(B)** Selected+unselected cases and controls.

BC – breast cancer, CC – colon cancer, SKCM – skin cutaneous melanoma, UM – uveal melanoma



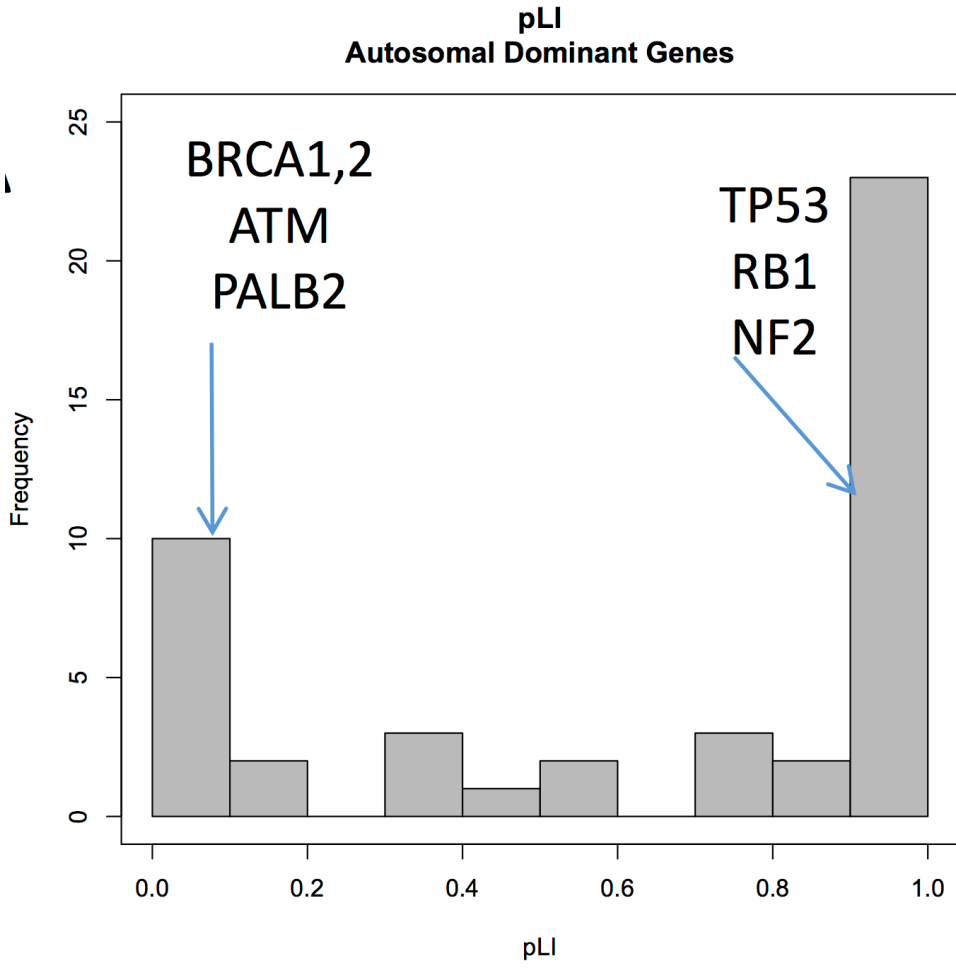

**Supplementary Figure 4.** pLI distribution in autosomal dominant genes.

**Supplementary Table 1. Dataset Summary**

| <b>Genetically Selected Cases</b>                      |                        |                        |                              |
|--------------------------------------------------------|------------------------|------------------------|------------------------------|
| Phenotype                                              | <b>Total Sequenced</b> | <b>Total Passed QC</b> | <b>Male/Female passed QC</b> |
| <b>Breast Cancer</b>                                   | 355                    | 355                    | 1/354                        |
| <b>Colon Cancer</b>                                    | 75                     | 75                     | 27/48                        |
| <b>Cutaneous Melanoma</b>                              | 292                    | 274                    | 129/145                      |
| <b>Ocular Melanoma</b>                                 | 101                    | 99                     | 46/53                        |
| <b>Li-Fraumeni</b>                                     | 45                     | 43                     | 7/36                         |
| <b>Total</b>                                           | 868                    | 846                    | 210/636                      |
| <b>Unselected Cases (TCGA)</b>                         |                        |                        |                              |
| <b>Breast Cancer</b>                                   | 1060                   | 820                    | 9/811                        |
| <b>Colon Cancer</b>                                    | 250                    | 250                    | 135/115                      |
| <b>Cutaneous Melanoma</b>                              | 397                    | 379                    | 233/146                      |
| <b>Ocular Melanoma</b>                                 | 47                     | 47                     | 27/20                        |
| <b>Total</b>                                           | 1754                   | 1496                   | 404/1092                     |
| <b>Controls</b>                                        |                        |                        |                              |
| <b>Controls</b>                                        | 24612                  | 7924                   | 5689/2235                    |
| <b>Samples used only for joint DNA variant calling</b> |                        |                        |                              |
| <b>Not used for analysis</b>                           | 10738                  | -                      | -                            |

**Supplementary Table 2.** Known cancer genes tested.

**Autosomal Dominant Genes:** ALK, APC, BAP1, BMPR1A, BRCA1, BRCA2, CDC73, CDH1, CDK4, CDKN1C, CDKN2A, CEBPA, DICER1, EPCAM, FH, GATA2, MAX, MEN1, MLH1, MSH2, MSH6, NF1, NF2, PALB2, PAX5, PHOX2B, PMS2, PRKAR1A, PTCH1, PTEN, RB1, RET, RUNX1, SDHA, SDHAF2, SDHB, SDHC, SDHD, SMAD4, SMARCA4, SMARCB1, STK11, SUFU, TMEM127, TP53, TSC1, TSC2, VHL, WT1.

**Autosomal Recessive:** ATM, BLM, BRIP1, DDB2, ERCC1, ERCC2, ERCC3, ERCC4, ERCC5, FANCA, FANCC, FANCD2, FANCE, FANCF, FANCG, FANCI, FANCL, FANCM, MUTYH, NBN, NHP2, NOP10, RAD51C, RECQL4, SH2B3, TERT, WRN, XPA, XPC.

**Tumor Suppressor:** ARHGEF12, ARID1A, ASXL1, AXIN2, BARD1, BCL10, BCR, BUB1B, CAMTA1, CASP8, CBFA2T3, CDH11, CDKN1A, CDKN2C, CHEK2, CREBBP, CYLD, ETV6, EXT1, EXT2, FBXW7, FHIT, FLCN, FOXO1, FOXO3, FOXO4, FOXP1, GPC3, HOXB13, IDH1, IGF2R, KLF6, LRIG3, MAF, MAFB, MAP2K4, MN1, MUC1, NCOA4, NDRG1, NOTCH1, NR4A3, PBRM1, PHF6, PML, PMS1, PRDM1, SMO, SOCS1, SYK, TCF7L2, TET2, TFE3, TNFAIP3, TRIM24, WIF1, ZBTB16.

**Supplementary Table 3.** Gene list analyses. Variants with MAC≤10.

| <b>(A) Autosomal Dominant Genes</b>                      |                   |                                                         |                           |                   |                                                         |
|----------------------------------------------------------|-------------------|---------------------------------------------------------|---------------------------|-------------------|---------------------------------------------------------|
| Protein-Truncating Variants                              |                   |                                                         |                           |                   |                                                         |
| Selected Cases (N=846)                                   | Controls (N=7924) | P (OR; OR CI)                                           | Unselected Cases (N=1496) | Controls (N=7924) | P (OR; OR CI)                                           |
| 32                                                       | 85                | <b>3.16x10<sup>-8</sup></b><br><b>(3.62; 2.32-5.54)</b> | 40                        | 85                | <b>5.95x10<sup>-6</sup></b><br><b>(2.53; 1.69-3.74)</b> |
| Damaging Missense Variants                               |                   |                                                         |                           |                   |                                                         |
| Selected Cases (N=846)                                   | Controls (N=7924) | P (OR; OR CI)                                           | Unselected Cases (N=1496) | Controls (N=7924) | P (OR; OR CI)                                           |
| 167                                                      | 1615              | 0.69 (0.96; 0.8-1.15)                                   | 307                       | 1615              | 0.92 (1.00; 0.88-1.16)                                  |
| <b>(B) Autosomal Recessive Genes</b>                     |                   |                                                         |                           |                   |                                                         |
| Protein-Truncating Variants (Homozygotes or Double Hets) |                   |                                                         |                           |                   |                                                         |
| Selected Cases (N=846)                                   | Controls (N=7924) | P (OR; OR CI)                                           | Unselected Cases (N=1496) | Controls (N=7924) | P (OR; OR CI)                                           |
| 0                                                        | 0                 | 1.0 (-;-)                                               | 0                         | 0                 | 1.0 (-;-)                                               |
| Damaging Missense Variants (Homozygotes or Double Hets)  |                   |                                                         |                           |                   |                                                         |
| Selected Cases (N=846)                                   | Controls (N=7924) | P (OR; OR CI)                                           | Unselected Cases (N=1496) | Controls (N=7924) | P (OR; OR CI)                                           |
| 1                                                        | 0                 | 0.1 (-;-)                                               | 1                         | 0                 | 0.16 (-;-)                                              |
| <b>(C) Tumor-Suppressor Genes</b>                        |                   |                                                         |                           |                   |                                                         |
| Protein-Truncating Variants                              |                   |                                                         |                           |                   |                                                         |
| Selected Cases (N=846)                                   | Controls (N=7924) | P (OR; OR CI)                                           | Unselected Cases (N=1496) | Controls (N=7924) | P (OR; OR CI)                                           |
| 2                                                        | 43                | 0.32 (0.43; 0.05-1.67)                                  | 8                         | 43                | 1 (0.99; 0.4-2.13)                                      |
| Damaging Missense Variants                               |                   |                                                         |                           |                   |                                                         |
| Selected Cases (N=846)                                   | Controls (N=7924) | P (OR; OR CI)                                           | Unselected Cases (N=1496) | Controls (N=7924) | P (OR; OR CI)                                           |
| 83                                                       | 661               | 0.15 (1.2; 0.93-1.52)                                   | 109                       | 661               | 0.18 (0.86; 0.7-1.07)                                   |
